# Supplementary material for: Coverage of the national surveillance system for human Salmonella infections, Belgium, 2016-2020
Source: PLoS One. 2021 Aug 26;16(8):e0256820. doi: 10.1371/journal.pone.0256820 (PMC8389443; doi:10.1371/journal.pone.0256820)
Supplement: S4 Table — Aggregated data per laboratory health insurance reference number (anonymized) on the number of reimbursed stool cultures and the number of Salmonella cases reported in the survey. (XLSX) [file pone.0256820.s004.xlsx]

## Sheet: Sheet1
Anonymized lab number from health insurance reference list	Number of reimbursed stool cultures	Number of Salmonella cases reported in the survey
1	1738	27
2	1398	16
3	2025	24
4	1604	13
5	12678	52
6	3746	33
7	495	7
8	3299	44
9	2723	16
10	942	7
11	1124	8
12	5236	27
13	2001	9
14	3854	25
15	4	10
16	4772	25
17	24764	155
18	937	8
19	2242	24
20	1105	5
21	942	1
22	7336	33
23	6086	39
24		16
25	4165	42
26	10199	107
27	3412	45
28		1
29	3803	24
30	2219	29
31	3422	20
32	6814	58
33	1899	14
34	1374	49
35	3499	32
36	9787	56
37	1650	13
38	1912	15
39	2594	19
40	1744	13
41	1352	9
42	4150	23
43	1569	10
44	8979	46
45	1754	13
46	893	7
47	6801	87
48	1629	8
49	2521	13
50	8012	74
51	3634	31
52	24652	209
53	1589	34
54	1997	20
55	8023	87
56	1965	11
57	1111	17
58	4458	20
59	3145	36
60	18320	15
61	5343	12
62	688	18
63	1626	11
64	3718	27
65		0
66	4987	37
67	5209	35
68	2784	28
69	3654	39
70	3802	13
71	2470	23
72	4789	21
73	2090	6
74	693	3
75	2445	23
76	1781	20
77	1881	7
78	1528	17
79	4280	56
80	1981	11
81	2001	6
82	2846	11
83	12809	69
84	6054	58
85	4284	39
86	3301	18
87	697	3
88	8074	49
89	1495	11
90	6266	24
91	2438	14
92	1867	13
93	2569	17
94	4310	18
95	1589	3
96	798	6
97	1411	16
98	3041	13
99	3120	53
100	1828	23
101	2105	12
102	1979	23
103	1231	7
104	9281	47
105	2018	2
106	1648	15
107	4870	17
